# Supplementary material for: Proposal of a stable B3S nanosheet as an efficient hydrogen evolution catalyst
Source: Royal Society of Chemistry journal article supplement (doi:10.1039/c8ta11797g), 2019-01-01
Supplement: c8ta11797g1.pdf [file c8ta11797g1.pdf]

## Supplementary information

# **Proposal of a Stable B<sub>3</sub>S Nanosheet as an Efficient Hydrogen Evolution Catalyst**

Hong Wu,<sup>a</sup> Xingxing Li,<sup>a,b</sup> Ruiqi Zhang<sup>a</sup> and Jinlong Yang<sup>\*a,b</sup>

<sup>a</sup> Hefei National Laboratory of Physical Sciences at the Microscale, University of Science and Technology of China, Hefei, Anhui 230026, China.

<sup>b</sup> Synergetic Innovation Center of Quantum Information & Quantum Physics, University of Science and Technology of China, Hefei, Anhui 230026, China.

\*Corresponding author: [jlyang@ustc.edu.cn](mailto:jlyang@ustc.edu.cn)

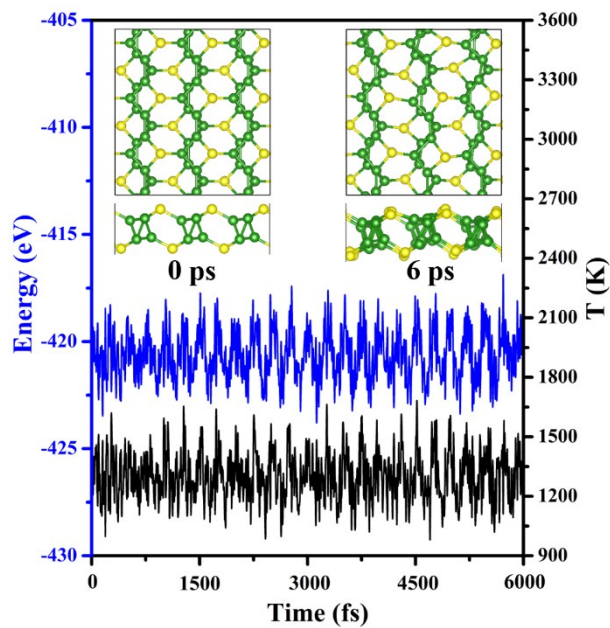

**Figure S1.** The fluctuation of total energy (blue) and temperature  $T$  (black) during the AIMD simulation at 1300 K. The insets are the top and side views of  $B_3S$  structure at the time of 0 and 6 ps, respectively.

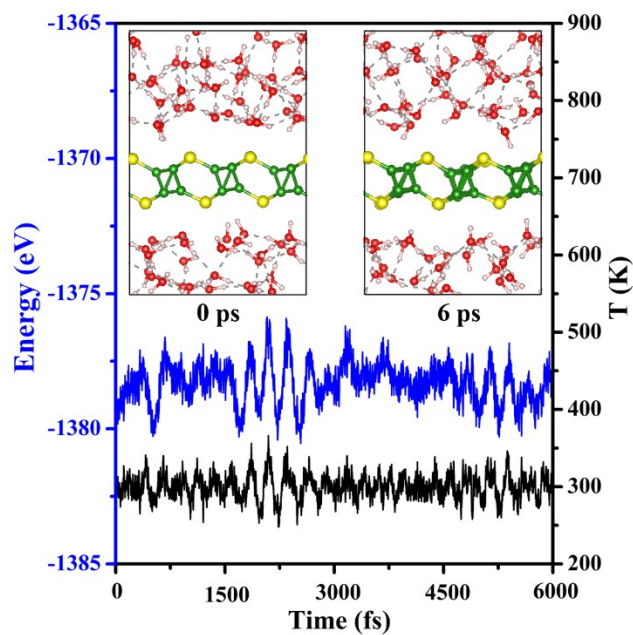

**Figure S2.** The fluctuation of total energy (blue) and temperature T (black) during 300 K AIMD in water environment. The insets are the side views of B<sub>3</sub>S structure with 64 H<sub>2</sub>O molecules at the time of 0 and 6 ps, respectively. Green, yellow, red and pale pink balls represent B, S, O and H atoms, respectively.

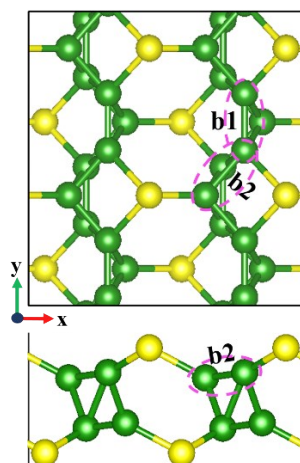

**Figure S3.** Two different B-B bridge sites (labelled as b1 and b2) on the  $B_3S$  surface that are possible for hydrogen adsorption. We find only the B-B bridge sites parallel to y-axis (b1) can stabilize atomic hydrogen, while a hydrogen atom initially placed on b2 site migrates to b1 site after structure optimization due to the steric repulsion of the surrounding S atoms.

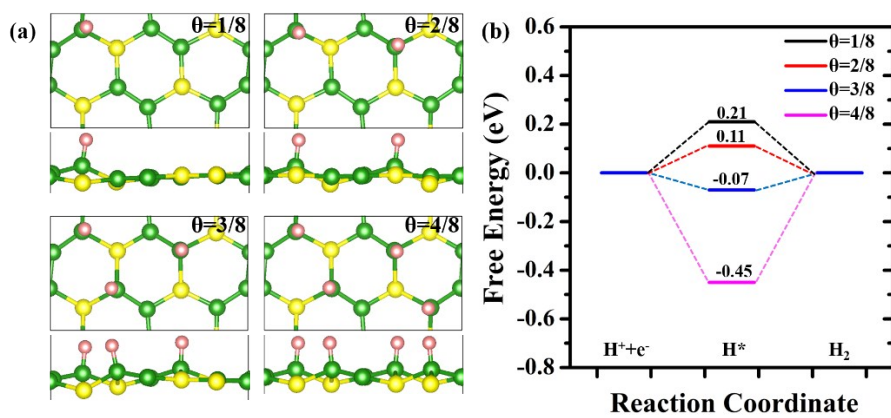

**Figure S4.** (a) The most stable configurations and (b) corresponding free energies of hydrogen adsorption on B<sub>2</sub>S monolayer under different hydrogen coverages. Green, yellow and pink balls represent B, S and H atoms, respectively.
